# Supplementary material for: Lithocholic acid derivatives as potent modulators of the nuclear receptor RORγt
Source: Royal Society of Chemistry journal article supplement (doi:10.1039/d3ra08086b), 2024-01-01
Supplement: d3ra08086b13.pdf [file d3ra08086b13.pdf]

*Electronic Supplementary Information*

**Lithocholic acid derivatives as potent modulators of the nuclear receptor ROR $\gamma$ t**

*Somaya A. Abdel-Rahman,<sup>a,b</sup> Simone Brogi,<sup>c</sup> and Moustafa T. Gabr<sup>a\*</sup>*

<sup>a</sup> *Department of Radiology, Molecular Imaging Innovations Institute (MI3), Weill Cornell Medicine, New York, NY 10065, USA. Email: mog4005@med.cornell.edu*

<sup>b</sup> *Department of Medicinal Chemistry, Faculty of Pharmacy, Mansoura University, Mansoura 35516, Egypt.*

<sup>c</sup> *Department of Pharmacy, University of Pisa, via Bonanno 6, 56126 Pisa, Italy*

**Contents**

|                                                                                     |    |
|-------------------------------------------------------------------------------------|----|
| Dose-response curve of ML-209 in the ROR $\gamma$ t reporter luciferase assay       | S2 |
| MST binding analysis of the binding of <b>A2</b> to ROR $\gamma$ t and ROR $\alpha$ | S2 |
| MST binding analysis of the binding of 3-oxoLCA to ROR $\gamma$ t and ROR $\alpha$  | S3 |
| Representative NMR and HPLC data for the synthesized compounds                      | S3 |

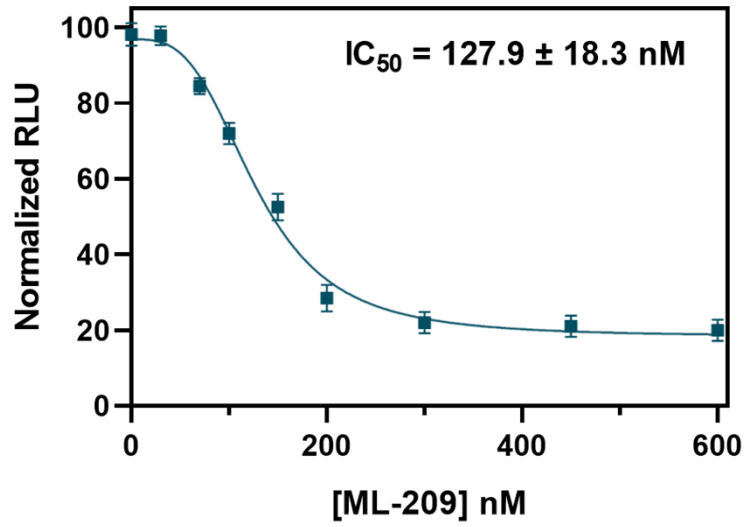

**Figure S1.** Dose-response curve of ML-209 in the ROR $\gamma$ t reporter luciferase assay. Error bars represent standard deviation (n=3).

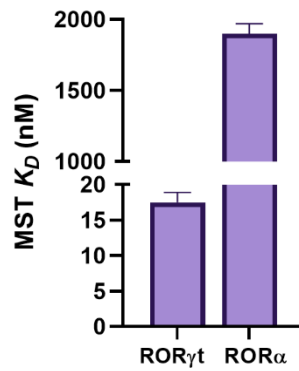

**Figure S2.** MST binding analysis of the binding of A2 to ROR $\gamma$ t and ROR $\alpha$ . The binding affinity (K<sub>D</sub>) is represented in nM. Error bars represent standard deviation (n = 3).

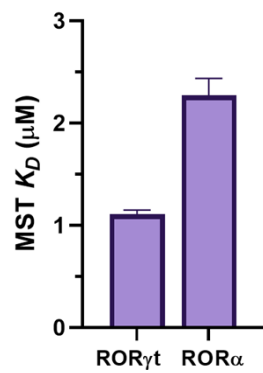

**Figure S3.** MST binding analysis of the binding of 3-oxoLCA to ROR $\gamma$ t and ROR $\alpha$ . The binding affinity ( $K_D$ ) is represented in  $\mu\text{M}$ . Error bars represent standard deviation ( $n = 3$ ).

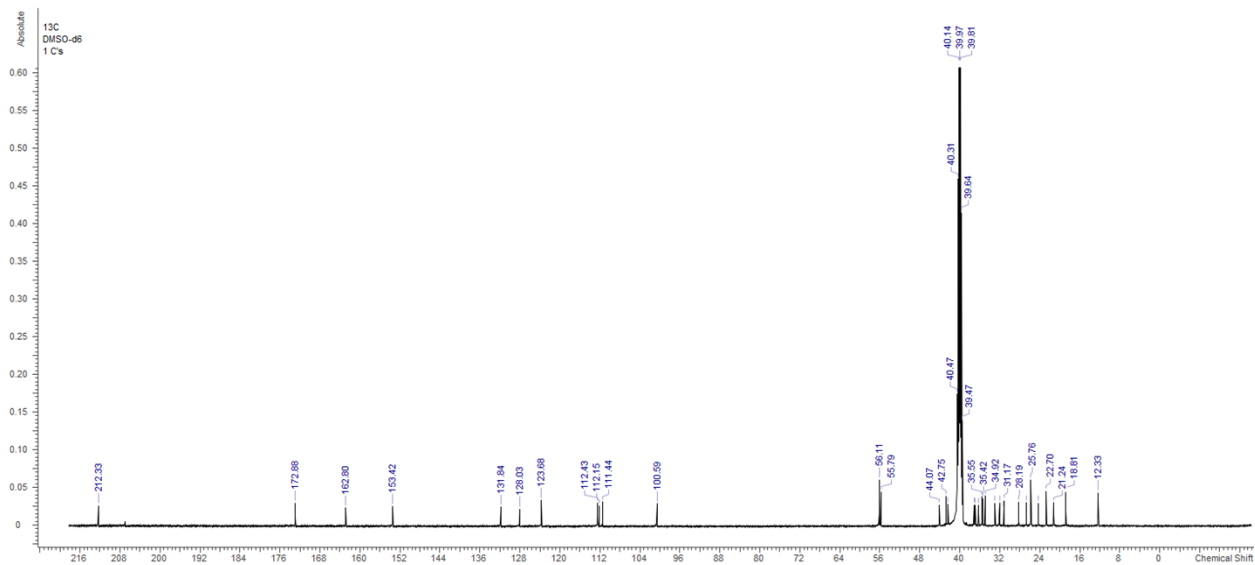

$^{13}\text{C}$  NMR spectrum of compound **A2**.

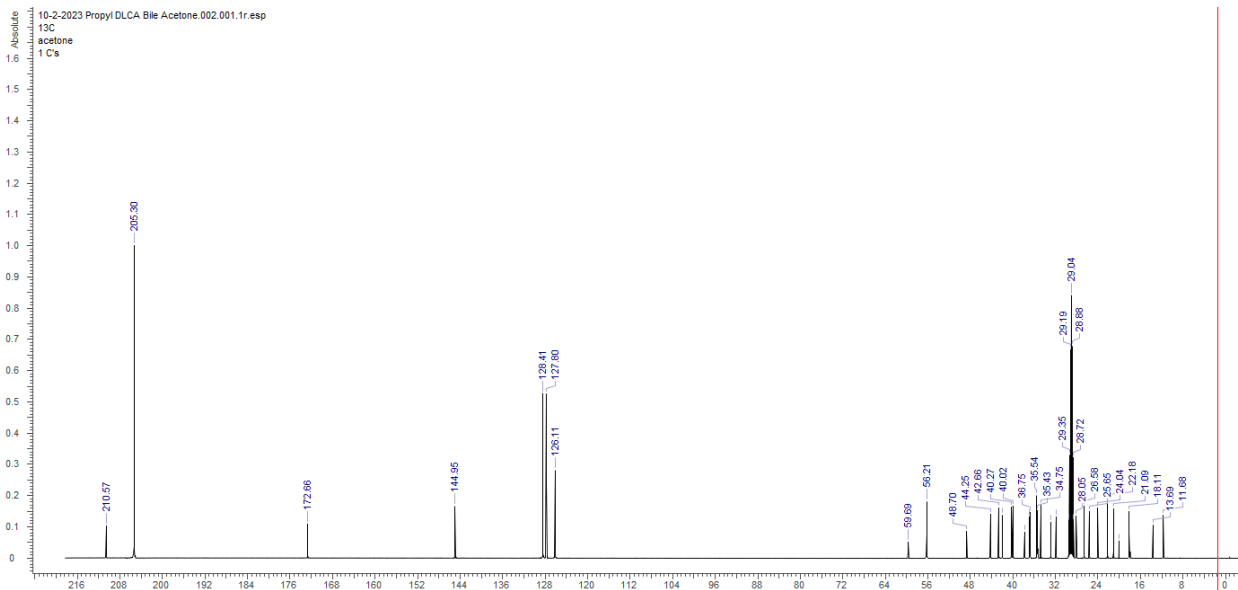

<sup>13</sup>C NMR spectrum of compound **A3**.

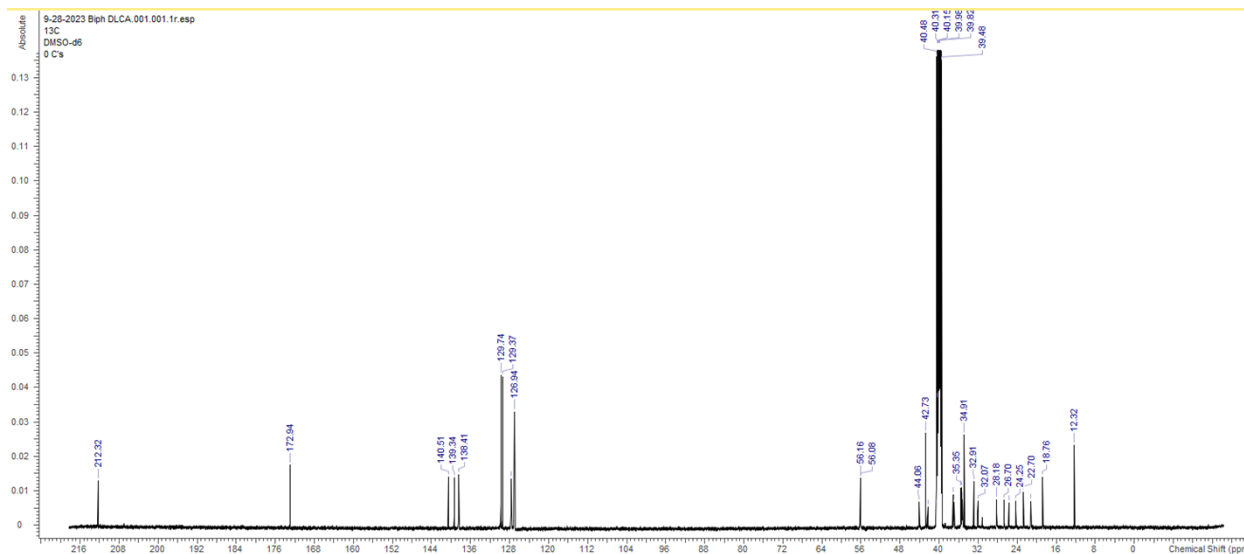

<sup>13</sup>C NMR spectrum of compound **A4**.

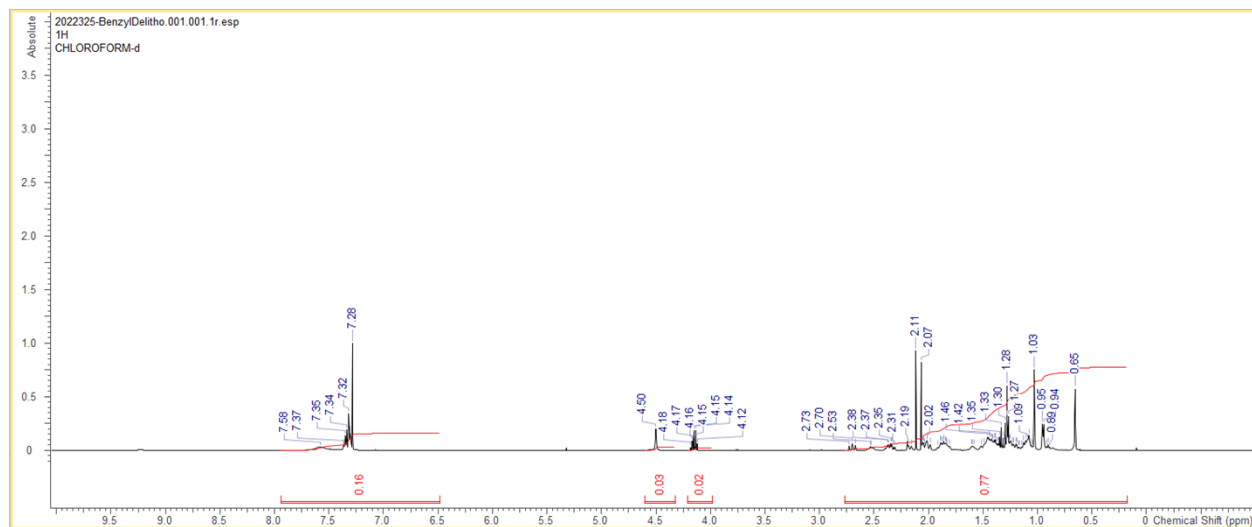

<sup>1</sup>H NMR spectrum of compound A5.

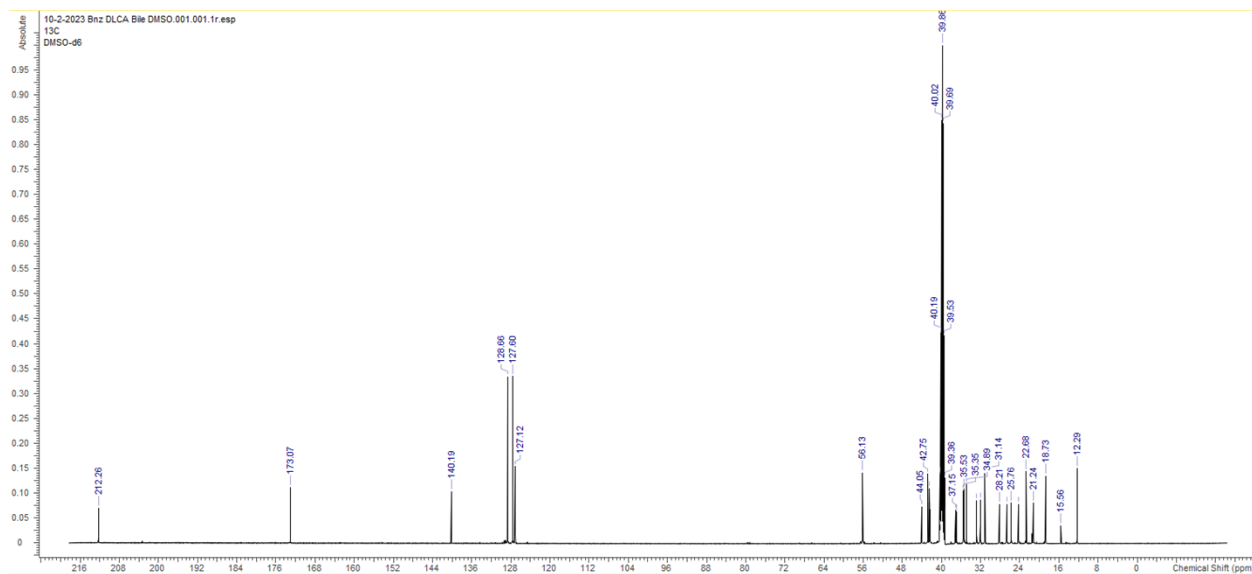

<sup>13</sup>C NMR spectrum of compound A5.

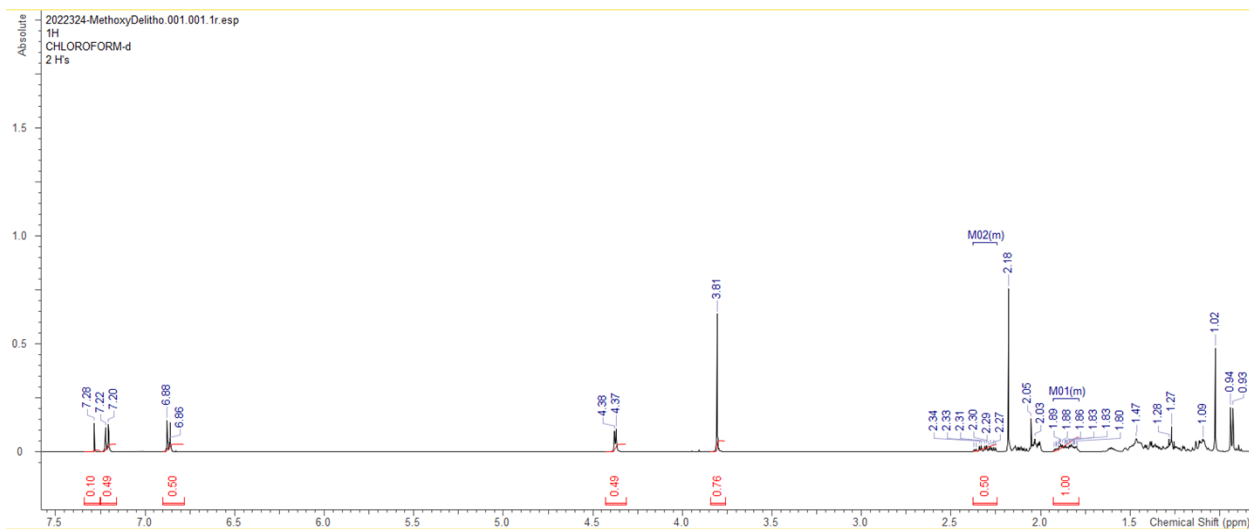

<sup>1</sup>H NMR spectrum of compound A6.

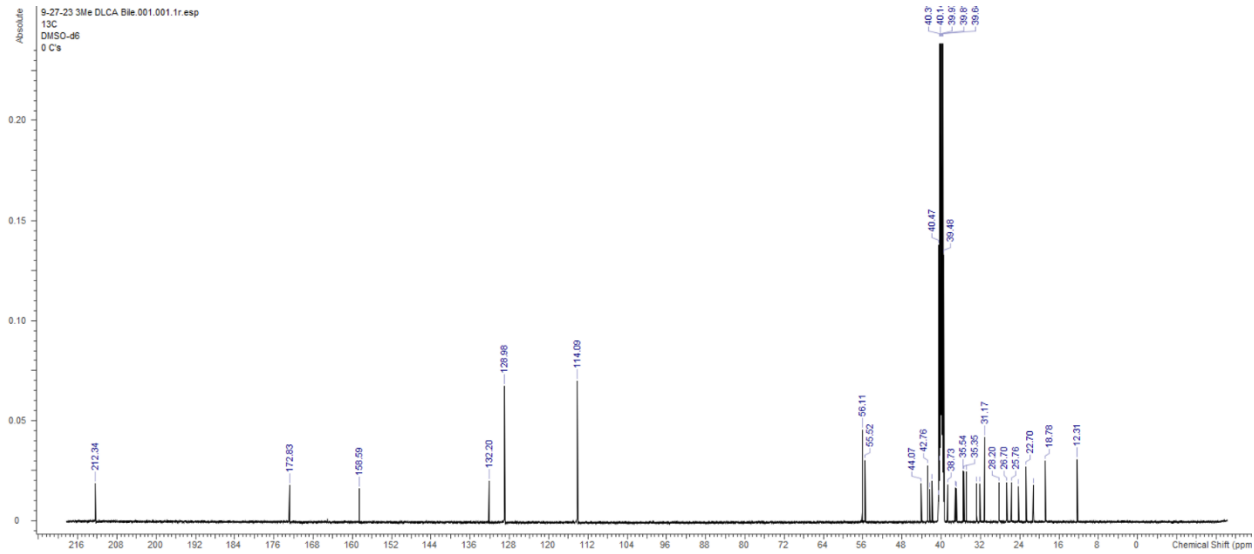

<sup>13</sup>C NMR spectrum of compound A6.

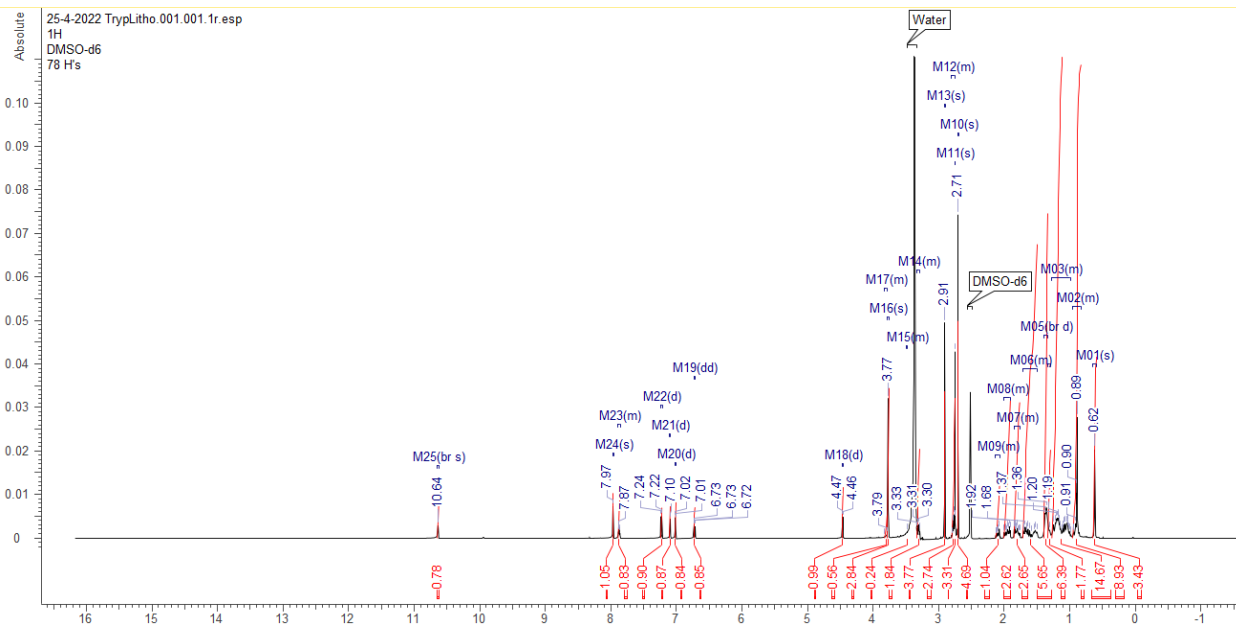

<sup>1</sup>H NMR spectrum of compound **B2**.

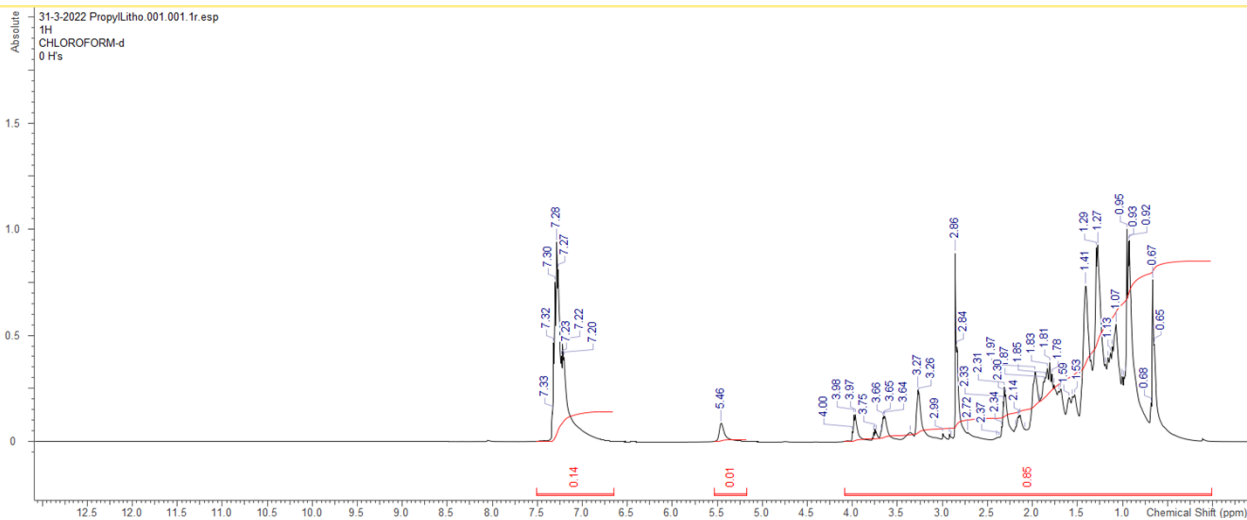

<sup>1</sup>H NMR spectrum of compound **B3**.

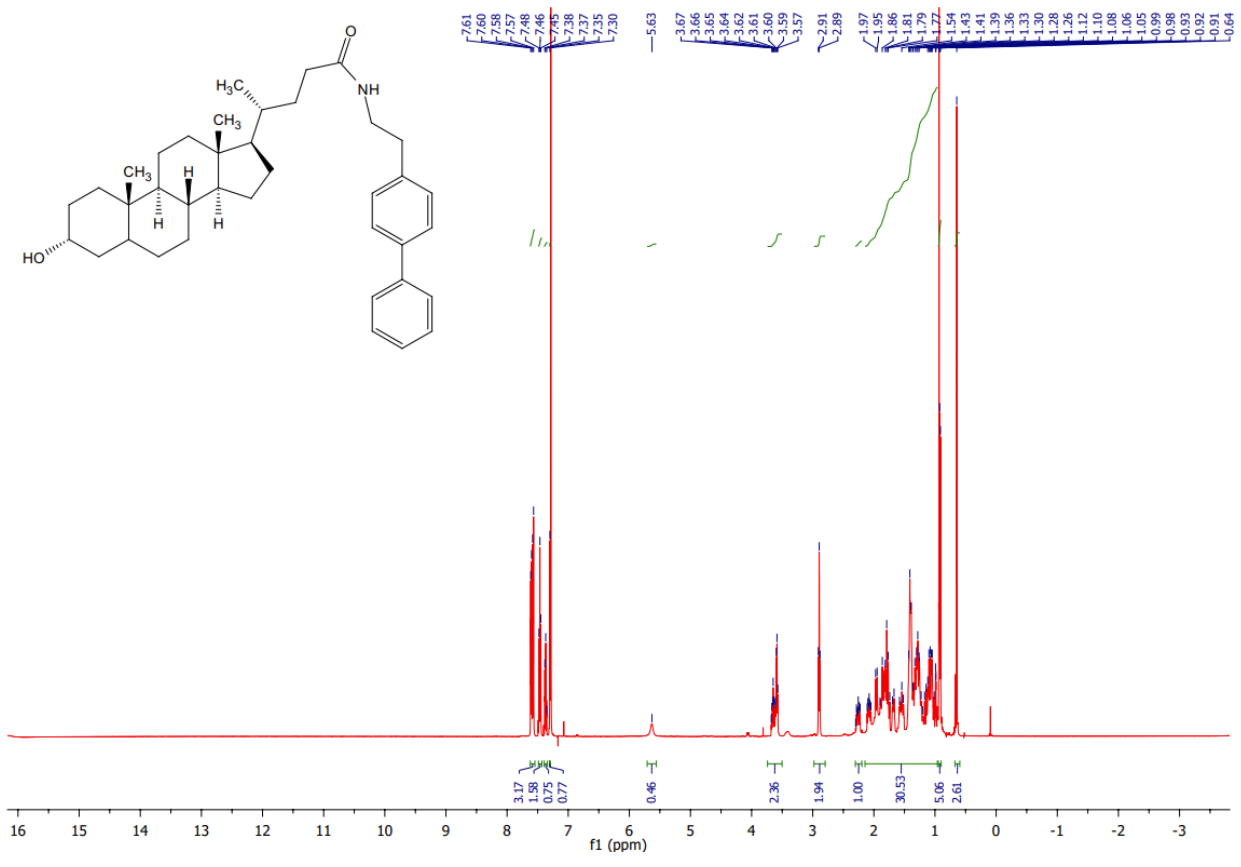

<sup>1</sup>H NMR spectrum of compound B4.

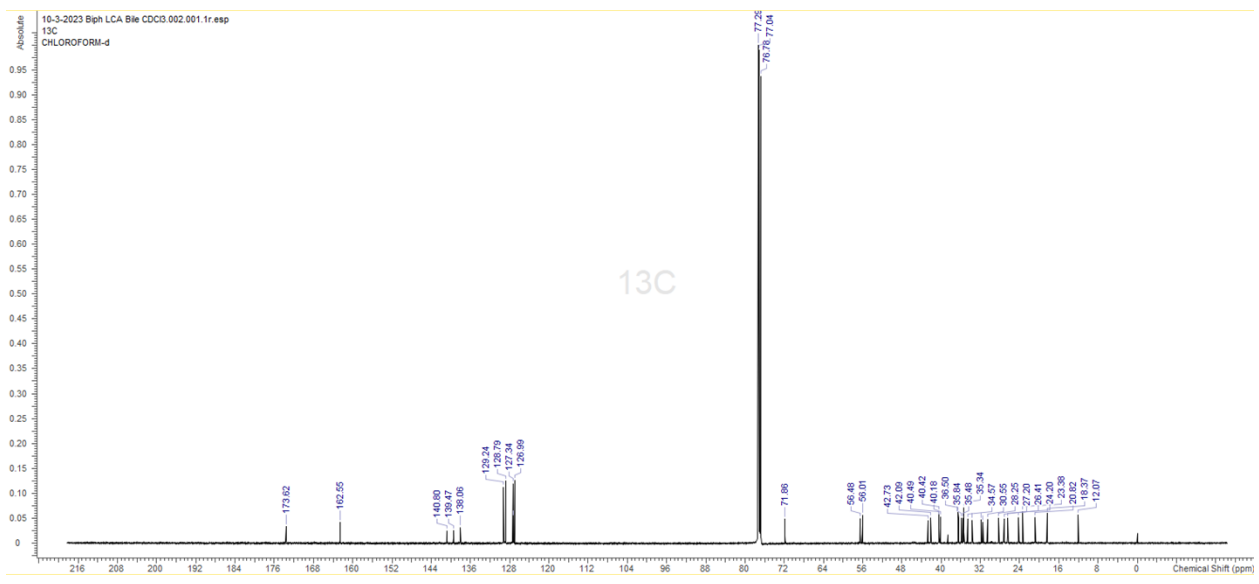

<sup>13</sup>C NMR spectrum of compound B4.





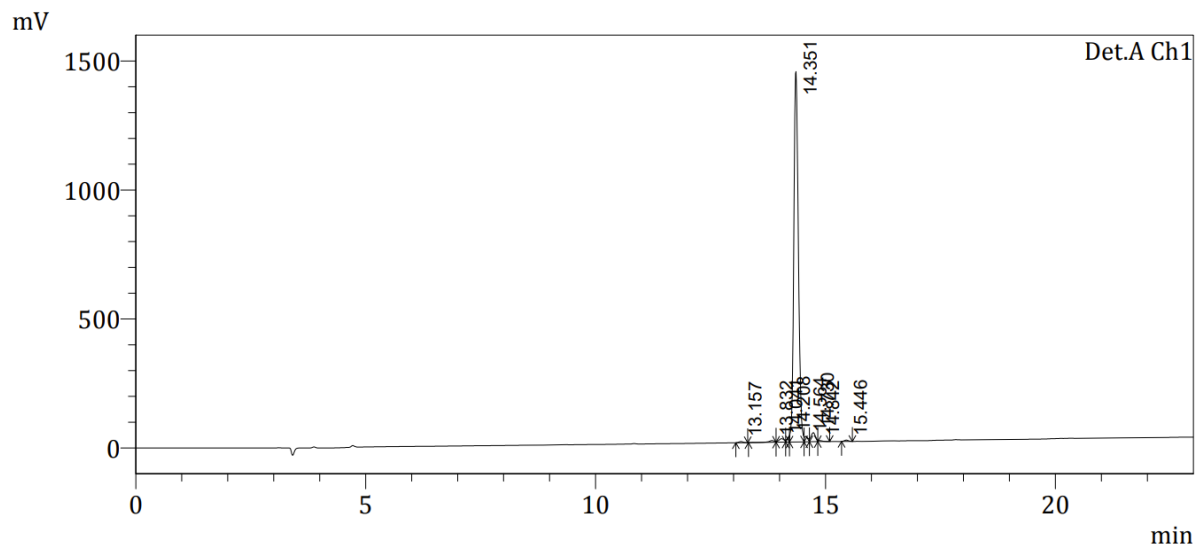

1 Det.A Ch1/220nm

HPLC trace for compound **A2**.

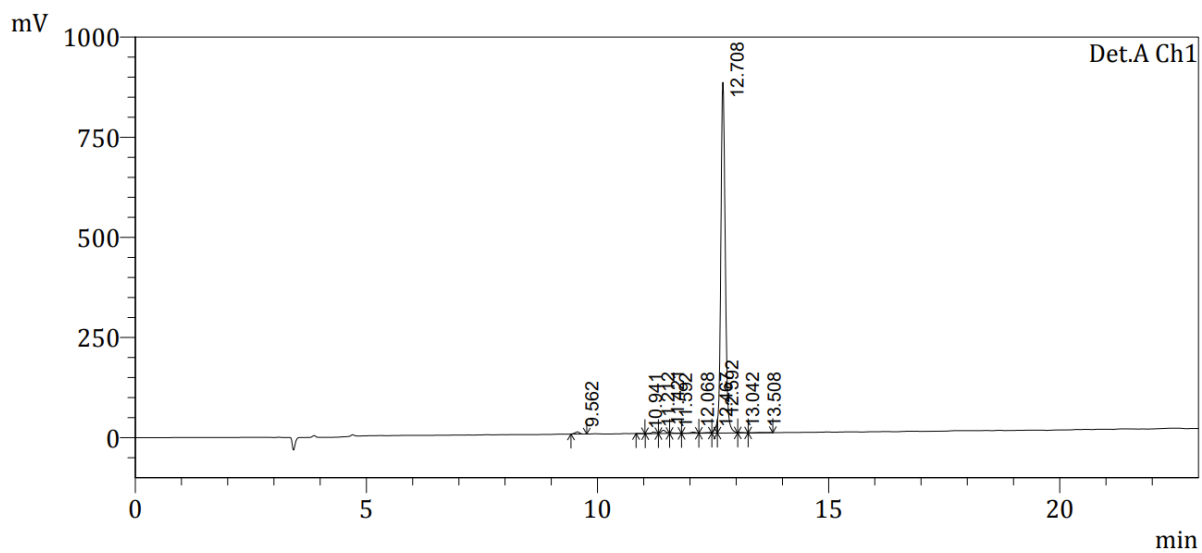

1 Det.A Ch1/220nm

HPLC trace for compound **A3**.

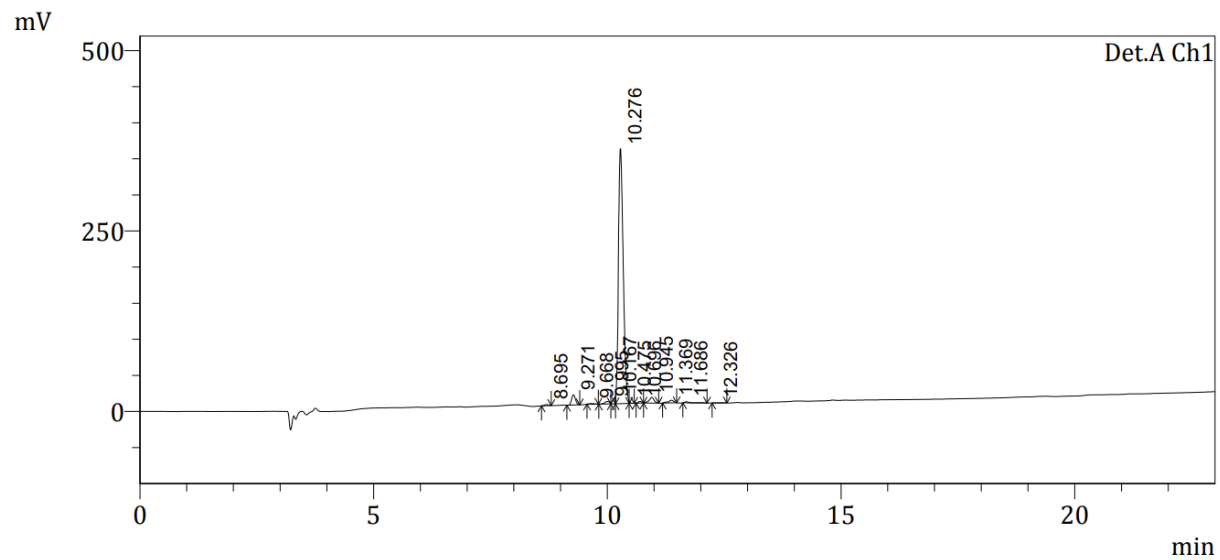

1 Det.A Ch1/220nm  
HPLC trace for compound **A4**.
